# Supplementary material for: Exploring the biophysical interaction of 3-pentadecylphenol with the head group region of a lipid membrane using fisetin as an interfacial membrane probe
Source: Royal Society of Chemistry journal article supplement (doi:10.1039/d1nj01484f), 2021-01-01
Supplement: d1nj01484f1.pdf [file d1nj01484f1.pdf]

## Supporting Information

### Exploring the Biophysical Interaction of 3-Pentadecylphenol with Head Group Region of Lipid Membrane using Fisetin as an Interfacial Membrane Probe

Jhili Mishra, Ashok Kumar Mishra, and Jitendriya Swain\*

Department of Chemistry, Indian Institute of Technology Madras, Chennai 600 036

[\\*jitendriyas4@gmail.com](mailto:*jitendriyas4@gmail.com)

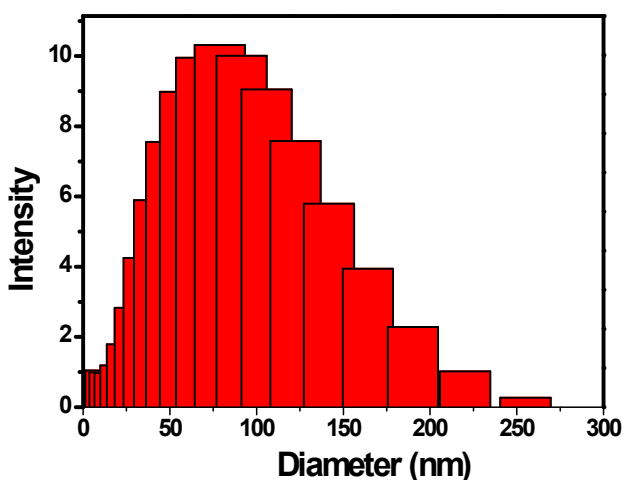

Figure S1: DLS histogram plot of DPPC SUVs at room temperature, [DPPC] = 0.4 mM

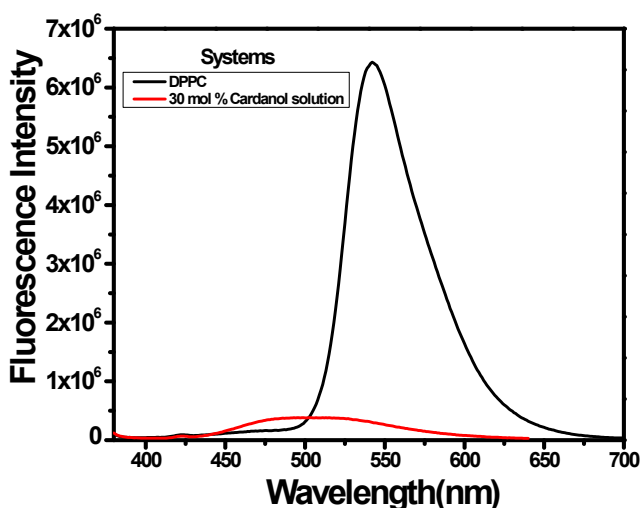

Figure S2: Emission spectra of fisetin in DPPC SUVs and 30 mol % PDP solution, [Fisetin] = 5 μM,  $\lambda_{\text{ex}}$  = 370 nm
